# Supplementary material for: Downregulation of 425G>A variant of calcium-binding protein S100A14 associated with poor differentiation and prognosis in gastric cancer
Source: Springer Nature journal article supplement (doi:10.1007/s00432-014-1830-0), 2014-09-29
Supplement: MOESM1 [file 8519974]

**Supplementary Table** **1** Primer sequences and PCR conditions for S100 genes

| Gene | Primer | Location | Primer sequence(5′→3') | Size (bp) | Annealing Tm( °C) |
| --- | --- | --- | --- | --- | --- |
| S100A2 | S | 339U | ATG TGC AGT TCT CTG GAG CA | 294 | 57.0 |
| As | 615D | TCA GGG TCG GTC TGG GCA |
| S100A10 | S | 113U | TGC CAT CTC AAA TGG AAC ACG | 327 | 54.6 |
| As | 419D | TCT TAT CAG GGA GGA GCG AAC |
| S100A11 | S | 160U | ATC GAG TCC CTG ATT GCT GT | 331 | 55.4 |
| As | 471D | AGA AAG GCT GGA AGG AAA GG |
| S100A6 | S | 83U | TCC AAG CCC AGC CCT CAG C | 205 | 52.0 |
| As | 265D | CGG TCC AAG TCT TCC ATC AGC CT |
| S100A14 | S | 66U | ACT CTC ACC AAA GGA CCA GAC AC | 449 | 58.7 |
| As | 494D | CAG GTG CAG GCT AGG GTA CAG |
| S100P | S | 164U | AGC ACG CAG ACC CTG ACC AAG | 253 | 58.5 |
| As | 395D | GGC TCT GCC AGG AAT CTG TGA C |
| S100B | S | 73U | ATG TCT GAG CTG GAG AAG | 342 | 53.7 |
| As | 396D | CTT GCT GTC TGC TTT CTT G |
| β-actin(1) | S | 662U | GGC TAC AGC TTC ACC ACC AC | 508 | 58.9 |
| As | 1149D | CGG ACT CGT CAT ACT CCT GCT |
| β-actin(2) | S | 549U | TCA CCC ACA CTG TGC CCA TCT ACG A | 295 | 60.0 |
| As | 819D | CAG CGG AAC CGC TCA TTG CCA ATG G |
| β-actin(3) | S | 1214U | TTA GTT GCG TTA CAC CCT TTC | 150 | 55.0 |
| As | 1345D | ACC TTC ACC GTT CCA GTT T |

**Supplementary Table** **2** The genotypes and frequencies at –43, 425 and 461 sites of

S100A14 gene among gastric tumors

| **Site Genotype Cases (%) Genotype Cases (%) Genotype Cases (%) Total** | | | | | | | |
| --- | --- | --- | --- | --- | --- | --- | --- |
| **-43** | GA | 15 (50.0) | AA | 13 ( 43.3) | GG | 2 ( 6.7) | 30 (100) |
| **425** | GA | 6 (12.0) | AA | 0 | GG | 44 ( 88.0) | 50 (100) |
| **461** | GA | 0 | GG | 13 (43.3) | AA | 17 (56.7) | 30 (100) |
